# Supplementary material for: Development of anticorrosive two pack polyurethane coatings based on modified fatty amide of Azadirachta indica Juss oil cured at room temperature – a sustainable resource
Source: Royal Society of Chemistry journal article supplement (doi:10.1039/c4ra01880j), 2014-01-01
Supplement: c4ra01880j1.pdf [file c4ra01880j1.pdf]

## Supporting Information

### Development of anticorrosive two pack polyurethane coatings based on modified fatty amide of *Azadirachta indica* juss oil cured at room temperature – A sustainable resource

Ashok Chaudhari, Anil Kuwar, Pramod Mahulikar, Dilip Hundiwale, Ravindra Kulkarni and Vikas Gite\*

School of Chemical Sciences,  
North Maharashtra University, Jalgaon- 425 001, Maharashtra, India

Email: [vikasgite123@gmail.com](mailto:vikasgite123@gmail.com)

**Table S1:** Characteristic properties of neem oil, AIJFA and PAIJFA

| Properties | Specific gravity @ 30 °C | Refractive index @ 40 °C | Acid value (mg of KOH/g) | Iodine value (g of I <sub>2</sub> / 100g) | Amine value (mg of KOH/g) | OH value (mg of KOH/g) |
|------------|--------------------------|--------------------------|--------------------------|-------------------------------------------|---------------------------|------------------------|
| Neem oil   | 0.920                    | 1.503                    | 0.5                      | 64.55                                     | 0.0                       | 0.0                    |
| AIJFA      | 0.928                    | 1.542                    | 0.0                      | 59.82                                     | 0.37                      | 205                    |
| PAIJFA     | 0.936                    | 1.578                    | 0.0                      | 46.89                                     | 6.08                      | 116                    |

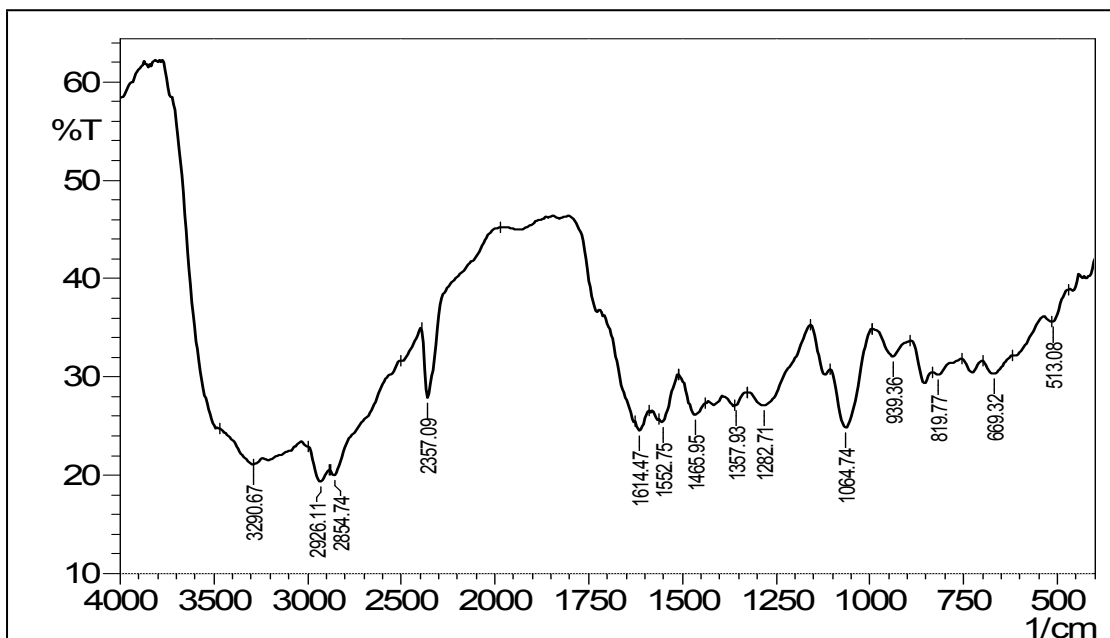

**Fig. S1:** FT-IR spectrum of PAIJFA

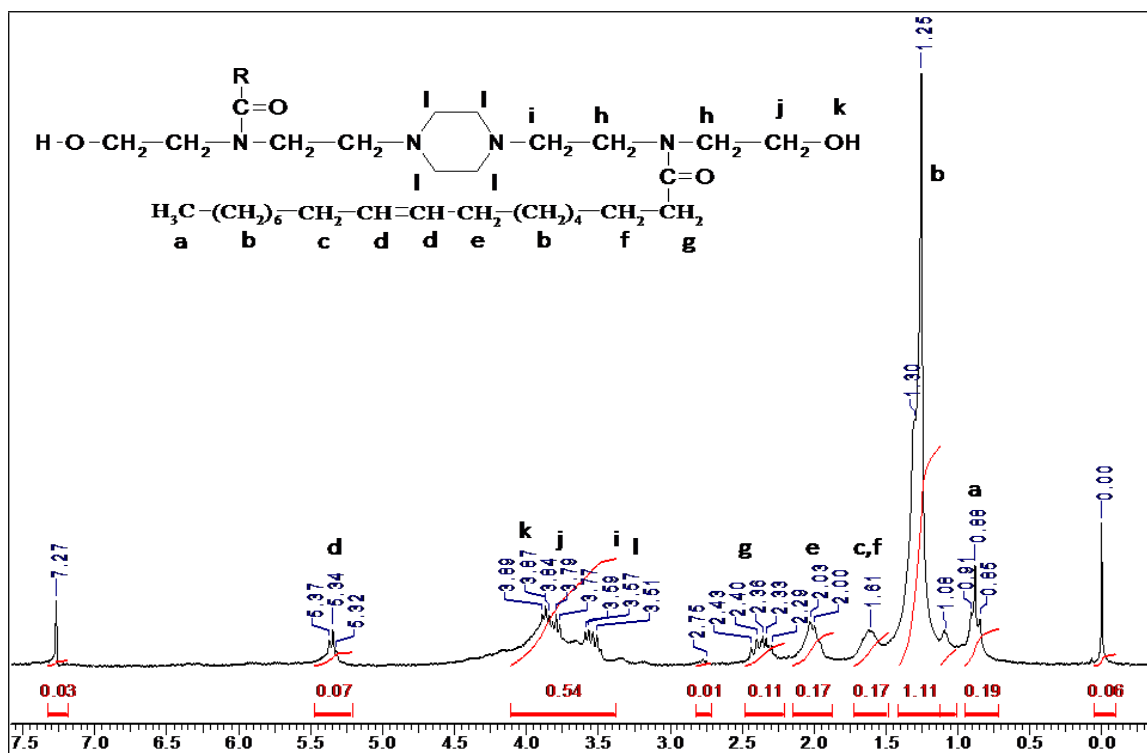

**Fig. S2:** <sup>1</sup>H NMR spectral analysis of PAIJFA

**Table S2:** PU coatings properties

| Sr. No. | Samples/ Property              | PU Coating prepared from |        |
|---------|--------------------------------|--------------------------|--------|
|         |                                | AIJFA                    | PAIJFA |
| 1.      | Surface dry (min) (± 5)        | 80                       | 65     |
| 2.      | Cross cut adhesion (Pass)      | 95                       | 98     |
| 3.      | Gloss (± 2)                    | 68                       | 82     |
| 4.      | Impact resistance (lb.inch)    | 32.72                    | 43.63  |
| 5.      | Mar resistance (g) (± 10)      | 100                      | 130    |
| 6.      | Pencil hardness                | 1H                       | 1H     |
| 7.      | Flexibility by conical mandrel | Pass                     | Pass   |

**Table S3:** Chemical resistance tests of the prepared PU coatings

| Test / Sample | Water      | Acid<br>(5 % HCl) | Alkali<br>(5 % NaOH) | Solvent<br>(Xylene) |
|---------------|------------|-------------------|----------------------|---------------------|
| PU-AIJFA      | unaffected | film swell        | slight cracks        | film swell          |
| PU-PAIJFA     | unaffected | loss in gloss     | loss in gloss        | loss in gloss       |

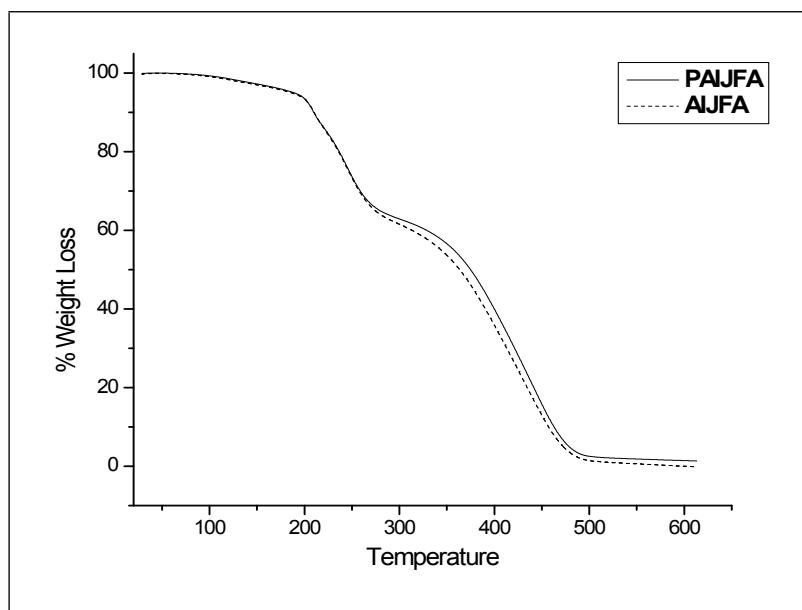

**Fig. S3:** Thermal analysis of prepared PU coatings

**Table S4:** Weight gain and weight loss study of coatings in water and NaCl solution

| Days | In water     |               | In aqueous NaCl (3.5 %) |               |
|------|--------------|---------------|-------------------------|---------------|
|      | PU-AIJFA (g) | PU-PAIJFA (g) | PU-AIJFA (g)            | PU-PAIJFA (g) |
| 1.   | 2.02560      | 2.00310       | 2.18920                 | 2.11456       |
| 2.   | 2.02639      | 2.00350       | 2.19148                 | 2.11627       |
| 3.   | 2.02720      | 2.00426       | 2.20393                 | 2.12042       |
| 4.   | 2.03182      | 2.00824       | 2.20507                 | 2.12483       |
| 5.   | 2.03297      | 2.00884       | 2.20413                 | 2.12651       |
| 6.   | 2.03158      | 2.00940       | 2.20387                 | 2.12865       |
| 7.   | 2.03125      | 2.00997       | 2.20113                 | 2.12974       |
| 8.   | 2.03047      | 2.00703       | 2.20067                 | 2.12852       |
| 9.   | 2.02941      | 2.00682       | 2.19859                 | 2.12567       |
| 10.  | 2.02937      | 2.00461       | 2.19564                 | 2.12305       |
| 11.  | 2.02876      | 2.00342       | 2.19458                 | 2.11968       |
| 12.  | 2.02732      | 2.00317       | 2.19292                 | 2.11722       |
| 13.  | 2.02645      | 2.00292       | 2.18856                 | 2.11656       |
| 14.  | 2.02598      | 2.00271       | 2.18349                 | 2.11589       |
| 15.  | 2.02419      | 2.00234       | 2.18050                 | 2.11422       |

Before cross hatch test

After cross hatch test

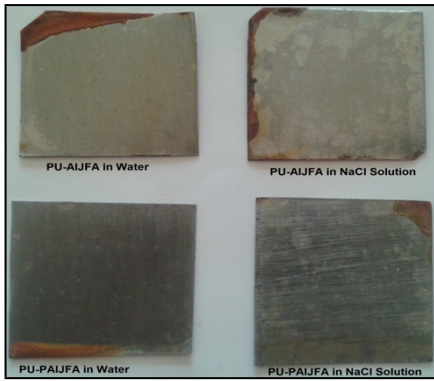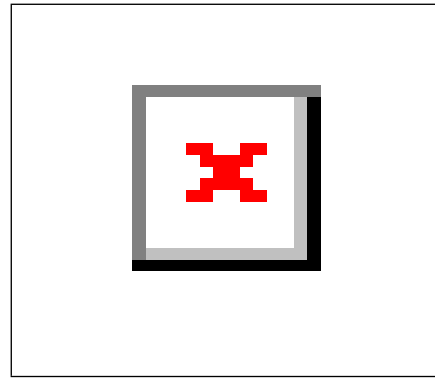

**Fig. S4:** Coated panels after dip experiment in water and NaCl Solution (before and after cross hatch test)
